# Supplementary material
Source: publisher figshare collection journal article supplement (https://gsajournals.figshare.com/ndownloader/files/14384543)
Supplement: Supplementary file 1 [file 14384543]

**Genomic prediction of autotetraploids; influence of relationship matrices, allele dosage, and continuous genotyping calls in phenotype prediction**

Ivone de Bem Oliveira*, †, Marcio F. R. Resende Jr.‡, Luis Felipe V. Ferrão*, Rodrigo R. Amadeu*, Jeffrey B. Endelman§, Matias Kirst††, Alexandre S. G. Coelho†, and Patricio R. Munoz*

*Blueberry Breeding and Genomics Lab, Horticultural Sciences Department, University of Florida, Gainesville, FL, USA, 32611

†Plant Genetics and Genomics Lab, Agronomy College, Federal University of Goias, GO, Brazil, 74690-900

‡Sweet Corn Genomics and Breeding, Horticultural Sciences Department, University of Florida, Gainesville, FL, USA, 32611

§Department of Horticulture, University of Wisconsin, Madison, WI, USA, 53706

††Forest Genomics Lab, School of Forestry Resources and Conservation, University of Florida, Gainesville, FL, USA, 32610

**Corresponding author:**

Patricio Ricardo Muñoz (p.munoz@ufl.edu)

**Figure S1** Model convergence obtained using different values for iterations (I), burn-in (B) and thinning (T) to perform the GS in BGLR for 1847 SHB genotypes. **A)** I=30K B=5K and T=5; **B)** I=60K B=10K and T =5; **C**) I=100K B=10K and T=5
